# Supplementary material
Source: PubMed Central journal article supplement (PMC6166205)
Supplement: kwy087_kinney_web_material_final.pdf [file kwy087_kinney_web_material_final.pdf]

Web Material

Web Table 1. Variable Descriptive Statistics and Transformations Used in the Factor Analysis

| <b>VARIABLE (x)</b>           | <b>Mean x</b> | <b>Median x</b> | <b>Range x</b> | <b>TRANSFORMATION of x</b> |
|-------------------------------|---------------|-----------------|----------------|----------------------------|
| Slicer_15pctIn_Total          | -917.4        | -918.0          | 273.0          | none                       |
| Slicer_15pctEx_Total          | -859.1        | -856.0          | 1521.0         | none                       |
| Slicer_IntensityMean_Ex       | -726.5        | -722.8          | 438.3          | none                       |
| Slicer_IntensityStdDev_Ex     | 163.8         | 162.4           | 176.1          | none                       |
| Slicer_ExpInspMeanAtten_ratio | 0.86          | 0.86            | 0.47           | none                       |
| WallAreaPct_seg               | 61.4          | 61.2            | 23.5           | none                       |
| TLCpred_race_adjusted         | 5.8           | 5.8             | 6.1            | none                       |
| FRCpred_race_adjusted         | 3.1           | 3.2             | 2.3            | none                       |
| FEV1pp_utah                   | 76.8          | 81.0            | 150.4          | none                       |
| FVCpp_utah                    | 87.4          | 88.0            | 153.6          | none                       |
| FEV1_FVC_utah                 | 0.67          | 0.72            | 0.85           | none                       |
| BDR_pct_FEV1                  | 5.8           | 4.4             | 166.2          | none                       |
| Insp_Below856_Slicer          | 58.9          | 64.0            | 90.1           | $\log(\min(x)+1-x)$        |
| BMI                           | 28.9          | 28.0            | 51.8           | $\log(x-\min(x)+1)$        |
| Slicer_IntensityMean_In       | -836.7        | -841.0          | 358.9          | $\log(x-\min(x)+1)$        |
| Slicer_IntensityStdDev_In     | 131.6         | 130.3           | 278.9          | $\log(x-\min(x)+1)$        |
| pctGasTrap_Slicer             | 21.8          | 14.7            | 87.8           | $\log(x-\min(x)+1)$        |
| Exp_Below910_Slicer           | 9.1           | 3.6             | 75.6           | $\log(x-\min(x)+1)$        |
| FEF2575_utah                  | 1.8           | 1.6             | 7.5            | $\log(x-\min(x)+1)$        |
| BDR_pct_FVC                   | 3.9           | 2.1             | 373.2          | $\log(x-\min(x)+1)$        |
| Insp_Below950_Slicer          | 6.2           | 2.0             | 61.9           | $-1/\sqrt{x-\min(x)+1}$    |
| Exp_Below950_Slicer           | 3.8           | 0.9             | 56.9           | $-1/\sqrt{x-\min(x)+1}$    |
| pctEmph_UpperThird_Slicer     | 7.1           | 1.6             | 84.9           | $-1/\sqrt{x-\min(x)+1}$    |
| pctEmph_LowerThird_Slicer     | 5.3           | 2.0             | 63.7           | $-1/\sqrt{x-\min(x)+1}$    |
| Pi10_SRWA                     | 3.7           | 3.7             | 1.3            | $-1/(x-\min(x)+1)$         |
| Pi15_SRWA                     | 5.2           | 5.1             | 1.4            | $-1/(x-\min(x)+1)$         |
| Insp_Below910_Slicer          | 23.9          | 20.1            | 79.7           | $\sqrt{x-\min(x)+1}$       |
| PEF_utah                      | 6.2           | 6.1             | 15.6           | $\sqrt{x-\min(x)+1}$       |

Web Table 2. Correlations of Factor Scores Between Race/Sex Subgroup Models Compared to the White Male Subgroup.

|              | Factor 1 | Factor 2 | Factor 3 | Factor 4 | Factor 5 |
|--------------|----------|----------|----------|----------|----------|
| White Female | 1        | 0.99     | 0.99     | 0.99     | 0.97     |
| Black Female | 0.98     | 0.84     | 0.98     | 0.96     | 0.96     |
| Black Male   | 0.98     | 0.91     | 0.99     | 0.99     | 0.99     |

Web Table 3. Coefficients for Derivation of Factor Scores

|                               | <b>Factor 1</b> | <b>Factor 2</b> | <b>Factor 3</b> | <b>Factor 4</b> | <b>Factor 5</b> |
|-------------------------------|-----------------|-----------------|-----------------|-----------------|-----------------|
| BMI                           | -1.20E-05       | -0.00076        | 0.001342        | 0.012263        | -0.00071        |
| Insp_Below950_Slicer          | 0.248774        | 0.084539        | -0.08694        | 0.288383        | -0.08986        |
| Insp_Below910_Slicer          | 0.244482        | 0.11173         | -0.19102        | -0.1675         | 0.014302        |
| Insp_Below856_Slicer          | 0.137604        | 0.097834        | -0.1569         | -0.33468        | 0.066165        |
| Slicer_15pctIn_Total          | -0.13671        | -0.02601        | 0.121237        | 0.088593        | 0.027063        |
| Slicer_IntensityMean_In       | -0.08096        | -0.00763        | 0.112577        | 0.188124        | -0.03398        |
| Slicer_IntensityStdDev_In     | 0.000502        | -0.00321        | 0.009737        | 0.045922        | -0.01076        |
| pctGasTrap_Slicer             | 0.005196        | 0.090231        | 0.165376        | 0.077538        | 0.043051        |
| Exp_Below950_Slicer           | 0.083883        | 0.018621        | 0.165393        | 0.484894        | 0.042728        |
| Exp_Below910_Slicer           | 0.123044        | 0.039635        | 0.326727        | 0.608872        | 0.089855        |
| Slicer_15pctEx_Total          | -0.00152        | -0.00686        | -0.0186         | -0.00438        | 0.000166        |
| Slicer_IntensityMean_Ex       | 0.067117        | -0.0342         | -0.42484        | 0.665428        | -0.00461        |
| Slicer_IntensityStdDev_Ex     | 0.013944        | 0.02311         | 0.014113        | 0.107818        | 0.005698        |
| pctEmph_UpperThird_Slicer     | 0.080073        | 0.026664        | -0.01842        | 0.121449        | -0.09006        |
| pctEmph_LowerThird_Slicer     | 0.052794        | 0.015467        | -0.03107        | 0.030941        | 0.034871        |
| Slicer_ExpInspMeanAtten_ratio | -0.23574        | -0.02207        | 0.613104        | -0.20726        | -0.03309        |
| Pi10_SRWA                     | -0.00144        | -0.01145        | -0.00296        | 0.00264         | -0.01069        |
| Pi15_SRWA                     | -0.00333        | -0.02246        | -0.00636        | 0.00276         | -0.00738        |
| WallAreaPct_seg               | -0.0021         | -0.02545        | -0.00941        | -0.00044        | -0.0171         |
| TLCpred_race_adjusted         | -0.00693        | 0.031241        | 0.012534        | -0.0171         | 0.504166        |
| FRCpred_race_adjusted         | -0.00544        | 0.025172        | 0.012718        | -0.01093        | 0.437007        |

|               |          |          |          |          |          |
|---------------|----------|----------|----------|----------|----------|
| FEV1pp_utah   | -0.03722 | 0.641778 | 0.390157 | 0.146651 | -0.10309 |
| FVCpp_utah    | -0.00162 | 0.211195 | 0.127951 | 0.043775 | -0.12647 |
| FEV1_FVC_utah | -0.03094 | 0.216483 | 0.134076 | 0.067394 | 0.097611 |
| PEF_utah      | -0.00203 | 0.034665 | 0.018976 | 0.008069 | 0.032864 |
| FEF2575_utah  | -0.00953 | 0.104866 | 0.058748 | 0.021032 | 0.08008  |

Web Figure 1

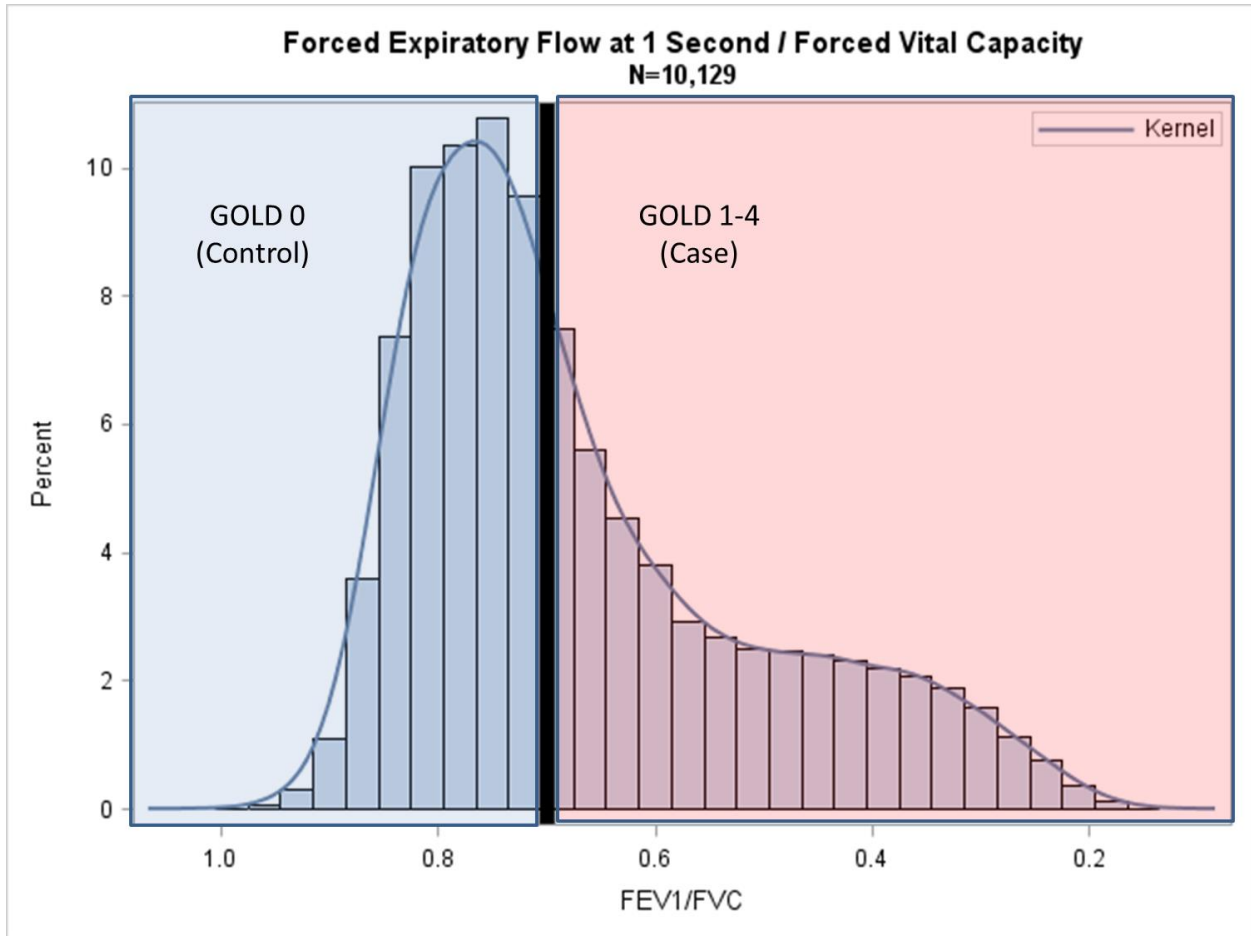

Figure 1 illustrates the distribution of FEV1/FVC measurement in the COPDGene population. COPD is commonly diagnosed using this measure where a value less than 0.8 represents disease (case) and a value greater than 0.8 versus no-disease (control). This figure does not represent the distribution of FEV1/FVC in the general population and represents the COPDGene population of >10 pack-year smokers recruited from 21 clinical sites in the US.

Web Figure 2

## COPD Disease Axes and Mortality

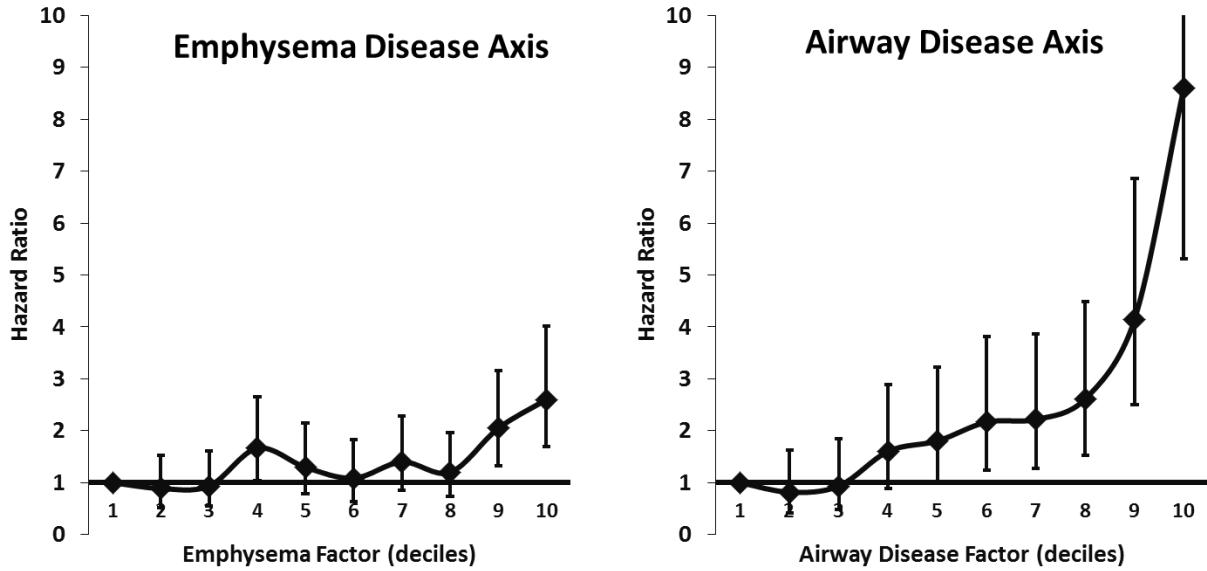

Cox Proportional Hazard Model: Models indicate a statistically significant synergistic interaction between the Emphysema and Airway Disease Axes. Airway Disease Axis included a statistically significant quadratic term.
